# Supplementary figures and images for: Identification of Escherichia coli ygaQ and rpmG as novel mitomycin C resistance factors implicated in DNA repair
Source: Oxford University Press journal article supplement (doi:10.1042/bsr20150249), 2015-12-25

Figure S1

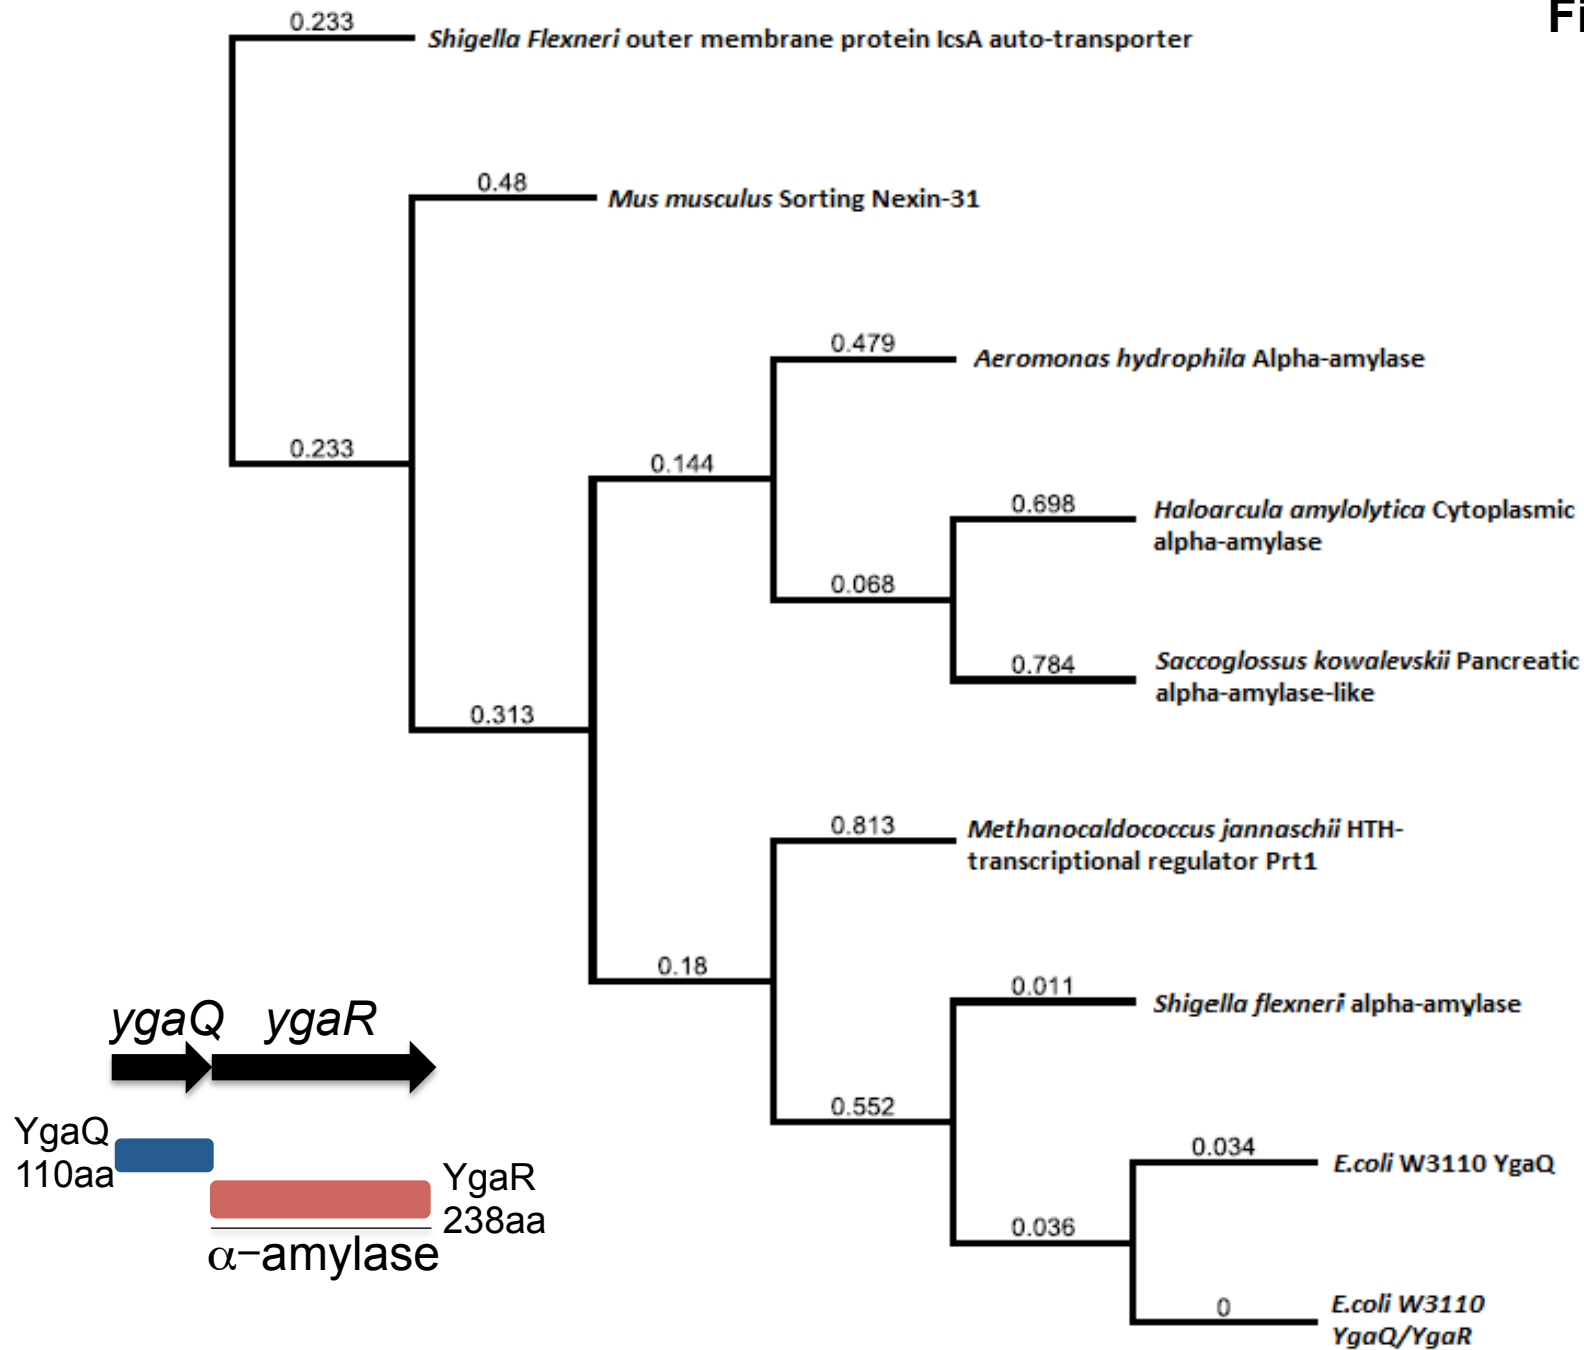

Figure S2

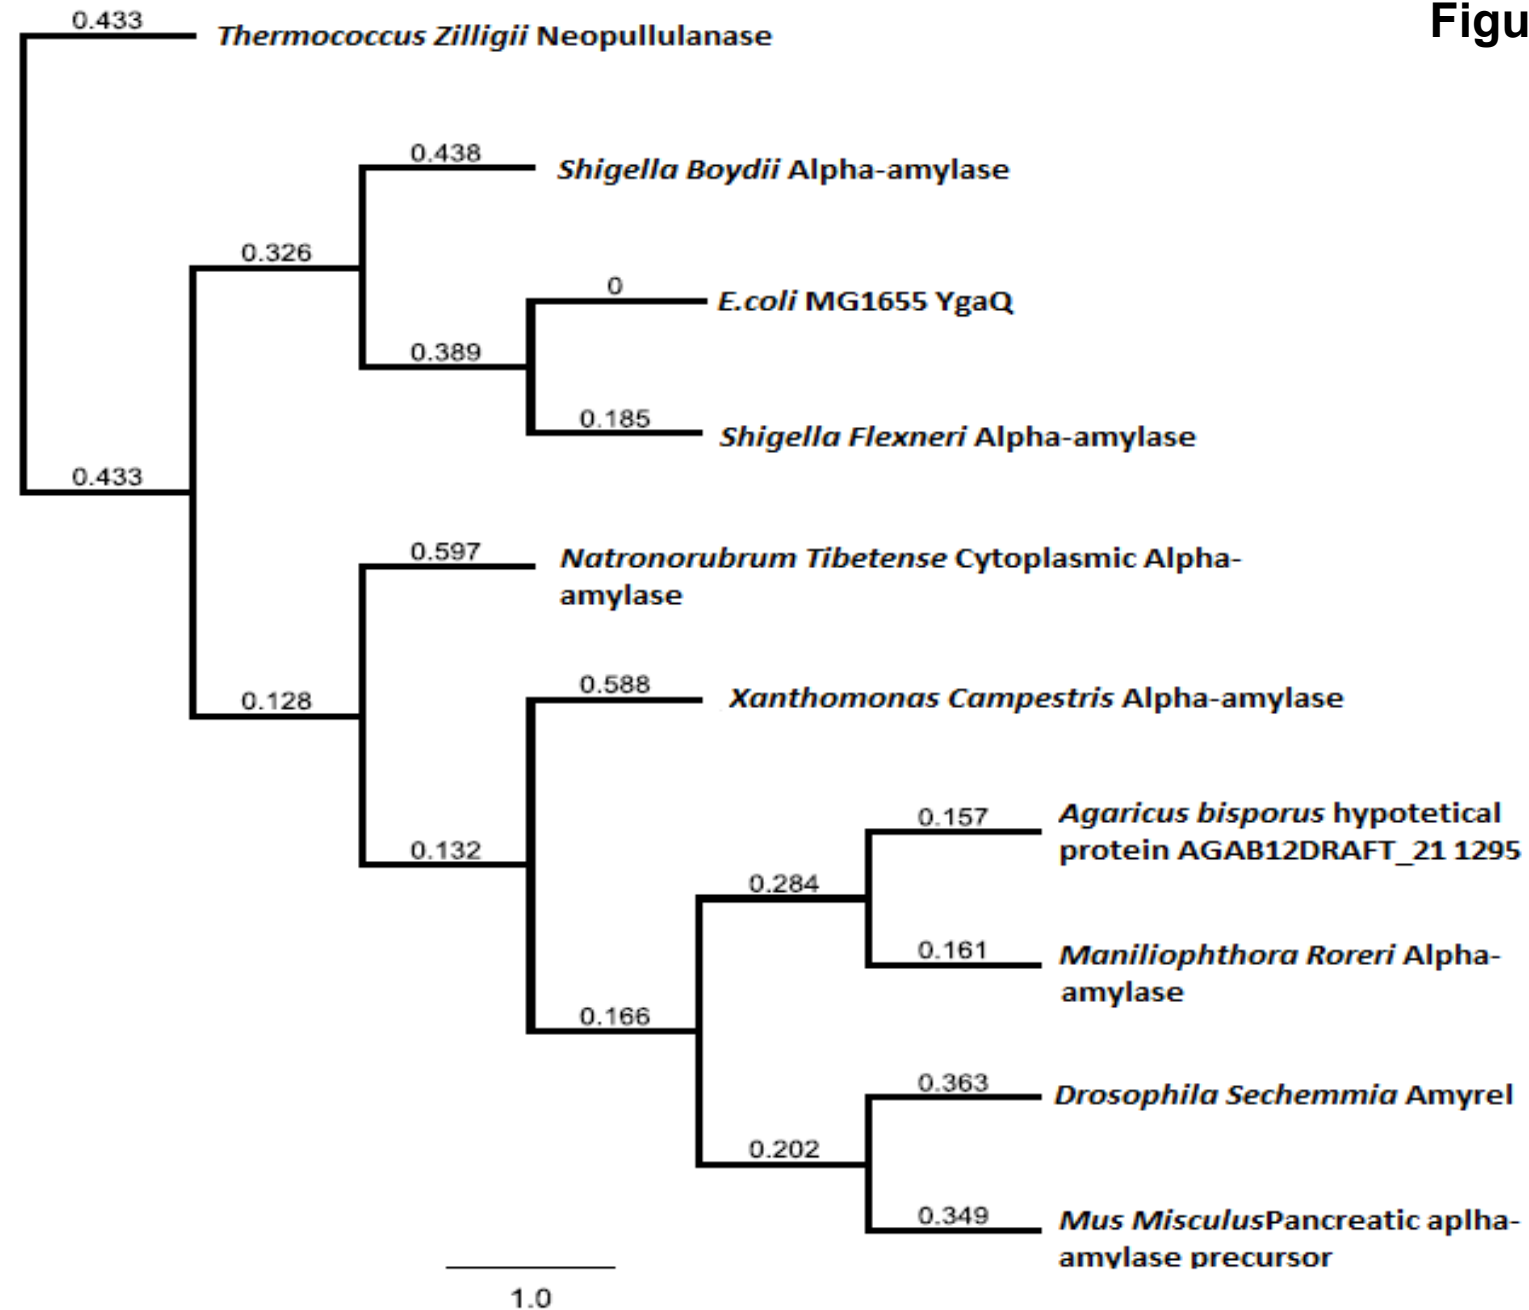

**Figure S3**

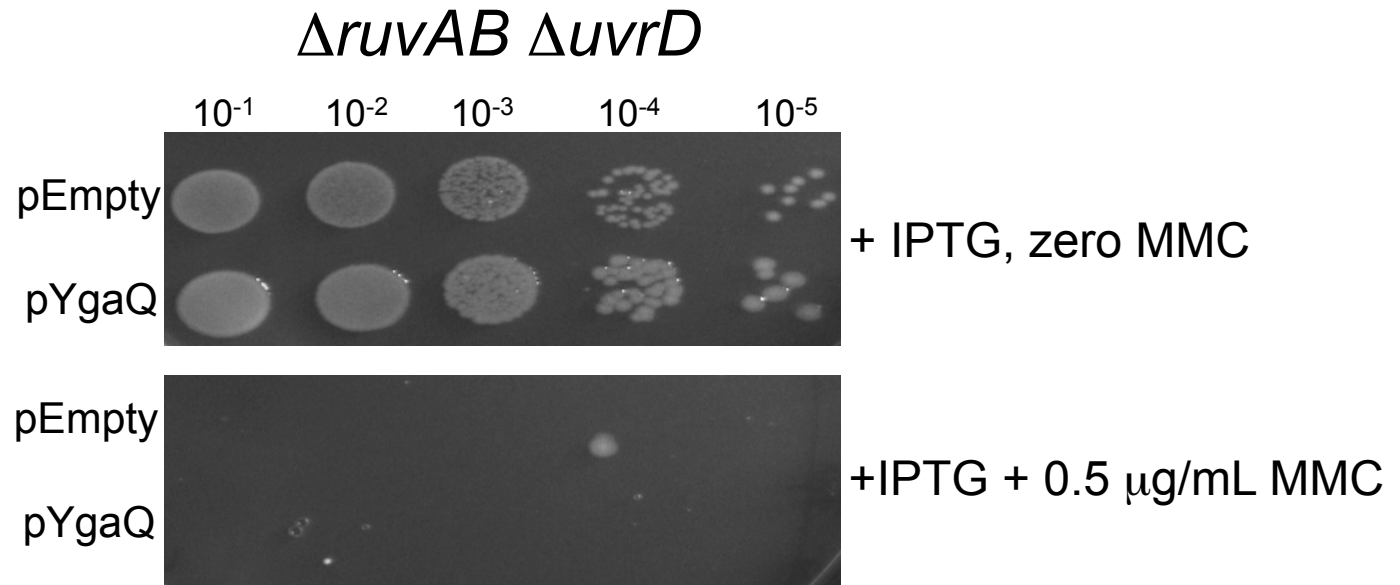

**Figure S4**

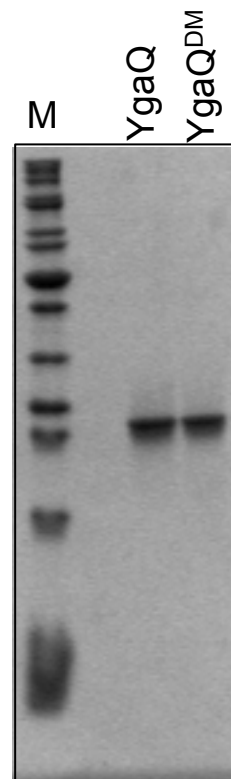

Supplement: bsr036e290add.pdf [file bsr036e290add.pdf]
